1 **Journal Name:** Ecology

2 **Manuscript Type:** Article

3 **Title:** Distinct latitudinal patterns of shifting spring phenology across the Appalachian Trail  
4 Corridor

5 **Authors:** Jordon Tourville<sup>1\*</sup>, Georgia Murray<sup>1</sup>, and Sarah Nelson<sup>1</sup>

6 **Affiliations:** <sup>1</sup>Appalachian Mountain Club, PO Box 298 Gorham, NH 03818, USA

7 **\*Corresponding Author:** Jordon Tourville; email: [jtourville@outdoors.org](mailto:jtourville@outdoors.org)

8 **Open Research Statement:** Data are provided as private-for-peer review in GitHub via the  
9 following link: [[https://github.com/jtourvi/AT\\_Phenology.git](https://github.com/jtourvi/AT_Phenology.git)]

10 **Keywords:** phenology, climate change, understory plants, canopy trees, Appalachian Trail,  
11 spring

12

13

14

15

16

17

18

19

20

21

22

23

24

25

## 26 **Abstract**

27 Warming associated with climate change will likely continue to advance the onset of  
28 spring phenology for many forest plants across the eastern United States. Understory forbs and  
29 spring ephemerals which fix a disproportionate amount of carbon during spring may be  
30 negatively affected by earlier canopy closure (i.e., phenological windows), however, information  
31 on the spatial patterns of phenological change for these communities is still lacking. To assess  
32 the potential for changes in spring phenological windows we synthesized observations from the  
33 Appalachian Mountain Club's (AMC) Mountain Watch (MW) project, the National Phenology  
34 Network (NPN), and AMC's iNaturalist projects between 2004 and 2022 ( $n = 118,250$ ) across  
35 the length of the Appalachian Trail (AT) Corridor ( $34^{\circ}\text{N}$ - $46^{\circ}\text{N}$  latitude). We used hierarchical  
36 Bayesian modeling to examine the sensitivity of day of year of flowering and leaf-out for 11  
37 understory species and 14 canopy tree species to mean spring temperature (April-June). We  
38 conducted analyses across the AT Corridor, partitioned by regions of  $4^{\circ}$  latitude (South, Mid-  
39 Atlantic, and North). Spring phenologies for both understory plants and canopy trees advanced  
40 with warming ( $\sim 6$  days/ $^{\circ}\text{C}$  and  $\sim 3$  days/ $^{\circ}\text{C}$ , respectively). However, sensitivity of each group  
41 varied by latitude, with phenology of trees and understory plants advancing to a greater degree in  
42 the mid-Atlantic region ( $\sim 10$  days/ $^{\circ}\text{C}$ ) than the southern or northern regions ( $\sim 5$  days/ $^{\circ}\text{C}$ ). While  
43 we find evidence that phenological windows remain stable in southern and mid-Atlantic portions  
44 of the AT, we observed an expansion of the spring phenological window in the north where there  
45 was greater understory temperature sensitivity compared to trees ( $\sim 1.6$  days/ $^{\circ}\text{C}$ ). Our analyses  
46 indicate differential sensitivity of forest plant phenology to potential warming across a large  
47 latitudinal gradient in the eastern United States. Further, evidence for a temperature-driven  
48 expansion of the spring phenological window suggests a potential beneficial effect for understory  
49 plants, although phenological mismatch with potential pollinators is possible. Using various  
50 extensive citizen-science derived datasets allows us to synthesize regional- and continental-scale  
51 data to explore spatial and temporal trends in spring phenology related to warming. Such data  
52 can help to standardize approaches in phenological research and its application to forest climate  
53 resiliency.

54

## 55 **Introduction**

### 56 *Spring phenology and changing climate*

57 Phenology represents the timing of critical life events for plants, both over their entire  
58 lifespan and on an annual cycle (see Table 1 for definitions of important terms used throughout  
59 this article; Cleland et al., 2007; Piao et al., 2019). The timing of events, such as flowering, bud-  
60 break, fruiting, and leaf senescence, and the synchronicity between these events and important  
61 climate and biotic interactions (pollination, seed dispersal, etc.) can dictate the performance (i.e.,  
62 fitness) of plant individuals or even entire populations (Aerts et al., 2006). For example, spring  
63 flowering timing of understory ephemerals in eastern North America is beneficial for plants

64 when synchronous with the peak activity of generalist insect pollinators, and when occurring  
65 after late-season frosts (Neufeld and Young, 2003; Inouye, 2008; Rafferty and Ives, 2011;  
66 Ettinger et al., 2018). In the former case, plant reproduction is enhanced through specific  
67 flowering phenology, and in the latter, plant growth and survival are improved when flowering  
68 avoids freezing temperatures. Phenological events are controlled tightly by physiological  
69 mechanisms which rely on environmental cues like temperature and photoperiod (Neufeld and  
70 Young, 2003; Gilliam, 2007; Wang et al., 2020; Moon et al., 2021).

71 In seasonal temperate forests, understory plants, which include spring ephemerals,  
72 perennial forbs, shrubs, and tree seedlings, spend the majority of the growing season in low-light  
73 conditions (Gilliam, 2007). To compensate, many of these species undergo bud break and leaf  
74 expansion (referred to as leaf-out) prior to full canopy closure in the spring (Neufeld and Young,  
75 2003; Lee and Ibanez, 2021a). In an environment with such high light-availability, understory  
76 species can fix the majority of their annual carbon budget in this time period, in some cases up to  
77 80-90% (Kudo et al., 2008; Augspurger and Salk, 2017; Heberling et al., 2018; Lee and Ibanez,  
78 2021b). Thus, the brief period of time (referred to as the phenological window) between  
79 understory leaf-out and canopy leaf-out is essential for understory plant performance (Heberling  
80 et al., 2019).

81 Given the tight coupling of spring phenology and climate, warming caused by climate  
82 change could alter the dynamics of the phenological window in several ways (Figure 1).  
83 Importantly, current evidence suggests that different plant functional groups (understory  
84 herbaceous plants and some shrubs *vs.* canopy trees) respond to different sets of environmental  
85 cues, meaning that spring phenology of each could be altered asynchronously given accelerating  
86 climate change and other global change drivers (Richardson and O’Keefe, 2009; Lee et al., 2022;  
87 Alecrim et al., 2022; Miller et al., 2023). For instance, canopy trees may be more responsive to  
88 air temperature (directly influenced by warming), while understory species may be relatively  
89 more sensitive to soil temperature and snow depth (Zohner et al., 2016; Jánosi et al., 2020). In a  
90 situation where canopy closure advances with air temperature increases at a greater rate than  
91 understory leaf-out, understory species may suffer from lower photosynthetic rates leading to  
92 reduced carbon gain, which may in turn have ecosystem-level consequences (Beard et al., 2019;  
93 Heberling et al., 2019). Monitoring the phenological response of both forest canopy trees and

94 understory plants is essential for understanding the risks posed by climate change in these  
95 systems.

### 96 *Contrasting patterns of phenological shifts*

97         Recent findings in eastern North America have illustrated greater advances of spring  
98 phenology for canopy trees compared to spring-blooming understory herbaceous species over a  
99 160-year period, leading to a potential future understory carbon budget loss of 12-26% from  
100 increased shading (Heberling et al., 2019). Another study estimating spring phenology from  
101 herbarium records came to similar conclusions for forests in eastern North America, although the  
102 spring phenological window remained stable with warming in European and East Asian forests  
103 (Lee et al., 2022). However, both Ge et al. (2015) and Alecrim et al., (2022) reached the opposite  
104 conclusion, finding an expansion of the spring phenological window within forests in China and  
105 the eastern United states, respectively, which, barring other phenological mismatches (i.e., with  
106 pollinators), could be a net positive for understory species. Thus, based on conflicting evidence  
107 there is no consensus on whether trees or understory plants are advancing their phenology more  
108 strongly in response to climate change.

109         These recent conflicting findings may be the result of challenges stemming from the high  
110 degree of environmental, geographic, genetic, and methodological variation encountered. For  
111 example, higher-latitude regions are warming faster than others (particularly in spring and  
112 winter), which could suggest greater magnitudes of phenological change over time in those  
113 locations if species' phenologies are responding principally to temperature (Rice et al., 2018;  
114 Montgomery et al., 2020). However, population-level intraspecific variation in phenological  
115 temperature sensitivity may serve to blunt these responses (McDonough MacKenzie et al., 2018;  
116 2019). Additionally, environmental variables both at a single site and across a wide geographic  
117 range, such as precipitation, elevation, and edaphic factors, could also affect how species track a  
118 changing climate (Du et al., 2020; Alecrim et al., 2022). This is particularly true given well-  
119 established geographical patterns, such as Hopkins' Bioclimatic Law which hypothesizes a 4-day  
120 shift in phenological events for every 1° latitude north, 5° longitude west, and 120 m increase in  
121 elevation (Hopkins, 1920). Additionally, the diversity of phenological data used to estimate the  
122 spring phenological window (i.e., wildflower leaf-out vs. flowering, herbaria records vs. direct

123 observation vs. experimental manipulation) could lead to different conclusions (Wolkovich et al.,  
124 2012; Heberling et al., 2019; Alecrim et al., 2022; Lee et al., 2022). To help resolve these  
125 discrepancies we need spatially and temporally extensive, multi-sourced phenological datasets  
126 comprised of different functional groups that represent variation in climate and topography  
127 across a large geographic area.

### 128 *Appalachian Trail Mega-transect and citizen science*

129 The Appalachian Trail (AT) Corridor and its surrounding 250,000 acres of federally  
130 protected lands form the AT Mega-transect (Cohn, 2008). This corridor harbors rare, threatened,  
131 and endangered species, encompasses important water resources, and shelters a high diversity of  
132 wildlife (Cohn, 2008). The AT's north-south alignment across 14 states represents a lengthy  
133 (12°) latitudinal gradient within the eastern United States and offers an ideal setting for collecting  
134 relevant phenological data on a continental scale (Wang, 2020a; Wang, 2020b). Threats to the  
135 environment of the AT—from encroaching development, acid rain and air pollution, invasive  
136 species, polluted water, and climate change—represent threats to the health of everyone  
137 downwind and downstream of the AT, roughly one-third of the U.S. population (McKinley et al.,  
138 2019; Burns et al., 2020). Thus, the AT Corridor thus serves as an excellent monitoring nexus for  
139 environmental conditions that directly affect more than 120 million Americans (McKinley et al.,  
140 2019). The dense population and abundant recreational opportunities near and within the AT  
141 Mega-transect also allow for ample community research engagement.

142 Community science, or citizen science, is the practice of engaging the community to  
143 participate and collaborate in scientific research (Wandersman, 2003; Tebes, 2005; Cooper et al.,  
144 2021). This method of data collection is a useful tool to expand spatial coverage of monitoring  
145 projects that would be otherwise hindered by funding and resources. Additionally, community  
146 scientists can help directly support conservation efforts, and build meaningful connections to  
147 their community and natural environment (Bonney et al. 2016). With long-term phenology  
148 monitoring supplemented with thousands of community scientist observations through platforms  
149 like iNaturalist (Table 1), changes and shifts in phenological responses to warming can be  
150 identified along the AT Corridor (Nugent, 2018; Soroye et al., 2022). Observing plant phenology

151 along the AT may allow us to better account for the high spatial and environmental variability  
152 common in studies investigating shifting phenology with climate.

### 153 *Study questions*

154         Given the uncertainty around the direction and magnitude of changes to the spring  
155 phenological window under a changing climate, as well as the need to understand the effects of  
156 warming on forests within the AT Corridor, it is imperative that we use spatially extensive  
157 phenological datasets. Using data from the Appalachian Mountain Club's (AMC) Mountain  
158 Watch (MW) Project, National Phenology Network (NPN), and iNaturalist, we first determined  
159 what climate or landscape factors are relevant drivers of spring phenology for our focal species  
160 (14 canopy tree and 11 understory species). Using this information, we asked, (Q1) is spring  
161 phenology of canopy trees and understory forbs and shrubs advancing with warming, (Q2) and if  
162 so, are there differences in phenological sensitivity to temperature between these groups (i.e.,  
163 causing a phenological mismatch)? We also asked (Q3) are there differences in the magnitude of  
164 phenological shifts across the length of the AT corridor (~12° latitude) and by individual taxa?

## 165 **Methods**

### 166 *Study region*

167         Our study area includes all temperate broadleaf forests within HUC10 (U.S. Geological  
168 Survey hydrological units, <https://irma.nps.gov/DataStore/Reference/Profile/2184124>)  
169 watersheds that intersect the Appalachian Trail and surrounding Corridor. Temperate forests of  
170 eastern North America are characterized by seasonality, with high light penetrating to the forest  
171 floor in the shoulder seasons (early spring and late fall), and low light under closed tree canopy  
172 during warmer months in the growing season (down to 1-5% canopy openness, Beeles et al.,  
173 2022). Northern hardwood communities comprising sugar maple (*Acer saccharum*) and  
174 American beech (*Fagus grandifolia*) dominate northern AT regions, while oak-hickory forests  
175 (*Quercus sp.* and *Carya sp.*) are common along the southern AT within lower elevations  
176 (Tourville et al., 2022; Janowiak et al., 2018). At higher elevations, evergreen montane spruce-fir  
177 forests proliferate, although these do not display the same seasonality as lower-elevation  
178 broadleaf forests. In the understory, herbaceous forbs, including spring ephemerals such as

179 *Dicentra sp. and Erythronium sp.*, shrubs such as *Viburnum sp.*, and tree seedlings of overhead  
180 canopy species are common (Heberling et al., 2019; Tourville et al., 2022).

181 The AT is the longest footpath in the world (~2,190 miles), traveling through 14 U.S.  
182 states from its southern terminus, Springer Mountain, Georgia, to its northern terminus, Katahdin  
183 in Maine (see Figure 2). Over 3 million people visit the trail each year, making it an ideal  
184 monitoring corridor for community science efforts, and where shifts in phenology can be  
185 recorded over large geographic extents (Cohn, 2008). From Southern Appalachian grassy balds,  
186 to the alpine zones of the Northeast, the AT is also home to diverse flora that may be influenced  
187 by climate change. Higher latitudes in the Appalachians are warming and experiencing longer  
188 growing seasons but elevational differences are mixed (Kimball et al., 2014; Janowiak et al.,  
189 2018; Murray et al. 2021). While data from many other global montane sites have demonstrated  
190 elevation-dependent warming (Pepin et al. 2022) this has not been the consistent pattern in the  
191 northern Appalachians (Murray et al. 2021).

#### 192 *Data collection*

193 In 2004, AMC began monitoring reproductive plant phenology events focused on  
194 flowering for alpine species, and later expanded to include woodland species (trees, shrubs, and  
195 forbs) and other phenophases such as leaf-out in northeastern mountains in the United States.  
196 Initially designated the Mountain Watch (MW) project, this effort enlisted organizational staff,  
197 partner organizations, and volunteers to gather phenology data on paper data sheets. The MW  
198 Project has since evolved to utilize the National Phenology Network's (NPN) protocol and  
199 currently collects data in two primary ways: through (i) the establishment of permanent plots in  
200 the White Mountains of New Hampshire, and (ii) by using phone applications (apps) and  
201 smartphones to enhance monitoring practices. In some cases, partner organizations have also set  
202 up permanent plots and similarly evolved to use the NPN protocol. In recent years, monitoring  
203 through community science has expanded from the Northeast to the entire AT Corridor using the  
204 platform iNaturalist.

205 iNaturalist is a free smartphone app with currently 2.5 million active users and nearly 70  
206 million observations (Barve et al., 2020; Callaghan et al., 2022). Users can upload photo  
207 observations, provide a species ID, or receive one based on the program's algorithm or a



208 community of online naturalists. Observations are made research grade once there are two  
209 corresponding species identifications. The iNaturalist geotagged images also reduce location  
210 errors and eliminate the past challenge of inaccurate species ID from novice observers  
211 (McDonough MacKenzie et al. 2017; McDonough MacKenzie et al. 2020). iNaturalist serves as  
212 a supplement to permanent plots as NPN plots require consistent attention from skilled  
213 naturalists while having limited spatial distribution. Importantly, iNaturalist observations can be  
214 used to fill gaps between monitoring plots and expand spatial and temporal data coverage.  
215 Researchers can also create projects on iNaturalist to capture observations of a specific species or  
216 geographical range.

217 AMC's iNaturalist phenology projects incorporate NPN's protocol as observation fields  
218 to identify the phenophase of a plant observation. Staff project curators and managers have the  
219 task of adding observations of target species within the AT Corridor to the project if they have  
220 not been uploaded to the project by the observer. AMC's iNaturalist project, *Flowers and Fauna*  
221 *along the Appalachian Trail Corridor*, began in 2018 and with continued dedicated funding has  
222 grown to now include >40,000 phenological observations (see Supplemental Figure S1). AMC's  
223 ultimate goal is to establish a long-term dataset that can be expanded and analyzed year after  
224 year to infer changes in plant phenological responses to changing climate along the full AT  
225 Corridor.

## 226 *Data Preparation*

227 We synthesized and collated phenological observations from three sources: the AMC's  
228 MW Project, the NPN online data portal, and the AMC's iNaturalist projects (>2 million  
229 observations). Observations ranged from 2004 to the end of 2022 and represented multiple  
230 phenophases (leaves, flowering, fruiting, senescence, etc.), and plant species (understory  
231 woodland, canopy trees, and alpine species). As we were only interested in spring leaf and  
232 flower phenology, we removed observations recorded of other phenophases and from other  
233 seasons from the dataset. Additionally, we used only positive observations of phenology in  
234 subsequent analysis (i.e., only records where the phenophase was actually observed). Since we  
235 were only comparing spring phenology of understory and tree species in temperate broadleaf  
236 forests, we removed alpine species observations from the dataset. Further, we removed



237 understory herbaceous species that either flower later in the growing season (i.e., after canopy  
238 closure), or had fewer than 100 observations. We only kept tree species that had the potential to  
239 maintain a dominant position in the forest canopy and had greater than 100 observations. We  
240 used ArcPro v3.1 (ESRI, 2022) to create a watershed delineation buffer using USGS HUC10  
241 watersheds around the AT. We included only records within our HUC10 AT buffer in our  
242 analysis (in the eastern United States between approximately 34-46°N latitude).

243 All observations were highlighted for either day of year (DOY) of leaf-out (tree species  
244 and understory species,  $DOY_{leaf}$ ) or DOY of open flowering (understory species,  $DOY_{flower}$ ),  
245 consistent with previous studies comparing phenology across forest strata (Heberling et al., 2019;  
246 Lee et al., 2022). NPN defines leaf-out as one or more individual leaves unfolded, meaning the  
247 entire length of the leaf has emerged from the bud (NPN, 2023). Flowering is defined as when  
248 one or more flowers are open so that reproductive parts are visible (NPN, 2023). Our approach  
249 assumes that herbaceous species' flowering and leaf-out timing is tightly correlated for these  
250 species (see Lee et al., 2022). Understory flowering may be a better choice of response over leaf-  
251 out because intensity values, or ordinal categories for each phenophase (e.g., <5%, 5-25%, 25-  
252 50%, 50-75%, 75-95%, >95%), are measured and associated with understory flowering but not  
253 understory leaf-out. Like canopy tree  $DOY_{leaf}$  which also have associated intensity values,  
254  $DOY_{flower}$  can be viewed as a distribution. Understory plants with or without leaves as a binary  
255 measure makes it difficult to truly assess true leaf-out timing.

256 We focused on common and ubiquitous species (found across the majority of the AT  
257 Corridor, minimum >4° latitude) that flowered and leafed out at approximately the same time in  
258 early spring. We subsequently removed observations where either leaf-out or flowering occurred  
259 after DOY 200, as these were either likely in error or a second flowering which occurs in some  
260 species under the right conditions. We also only included tree observations where budburst or  
261 leaf expansion intensity values were 75-95%, indicating nearly total leaf-out. In total, after  
262 accounting for observations that were excluded from our original search, we collected data for a  
263 total of 25 species (14 tree species and 11 understory forb and shrub species) consisting of  
264 118,250 individual observations across the entire AT Corridor (Figures 2, 3). In order to examine  
265 latitudinal differences in spring phenology, observations were partitioned among three 4°

266 latitudinal bands: Southern AT (34-38°N), mid-Atlantic (38-42°N), and Northern AT (42-46°N)  
267 (Figure 3).

268 Since all observations were geolocated (we only kept observations with < 250 m  
269 accuracy error), we were able to extract potentially relevant landscape and climatological data  
270 for each record. DAYMET 1 km gridded climate data were extracted for the year an individual  
271 observation took place, which included mean, maximum, and minimum air temperatures (°C),  
272 solar radiation (W/m<sup>2</sup>), snow water equivalent (SWE, mm), vapor pressure deficit (Vpd, kPa),  
273 and total precipitation (mm) (Daymet: Daily Surface Weather Data on a 1-km Grid for North  
274 America, Version 4 R1 <https://doi.org/10.3334/ORNLDAAAC/2129>). Daily values were extracted  
275 for the entire year which the observation was recorded allowing us to calculate daily, monthly,  
276 seasonal, and annual mean values for each climate variable. Accumulated growing degree days  
277 (AGDD) were also derived from DAYMET temperature data using Equation 1 (Gavin et al.,  
278 2008; Wason and Dovciak, 2017; Tourville et al., 2022):

$$279 \quad AGDD = \sum \left( \frac{T_{max} - T_{min}}{2} - T_{base} \right) \quad (1)$$

280 Where *AGDD* is the accumulated maximum value of growing degree days for spring only,  $T_{max}$   
281 and  $T_{min}$  are daily maximum and minimum temperatures, and  $T_{base}$  is a constant (4°C). Elevation  
282 at each observation location was extracted from a national 10 m digital elevation model (DEM).

### 283 *Data Analysis*

284 In order to determine which candidate geographic and climate variables (Table 2)  
285 influence spring phenology for both understory and canopy species and warranted inclusion in  
286 subsequent models, a preliminary exploratory multiple regression analysis was undertaken using  
287  $DOY_{leaf}$  and  $DOY_{flower}$  as a response. Our main candidate variables included mean spring  
288 temperature (April-June, AMJ), mean previous winter temperature (DJF), spring AGDD,  
289 seasonal SWE (proxy for snow depth, DJF) latitude, and elevation (see Table 2 for all possible  
290 candidate variables). Spring temperature was calculated as the average of the April, May, and  
291 June daily temperatures for the year and the location associated with each phenology record.  
292 April-June temperatures explained more variation in  $DOY$  than other spring windows (i.e.,  
293 March-May, or individual months). All variables were scaled and centered and global models

294 with all candidate variables were examined. For both understory and canopy species,  
295 standardized regression coefficients for mean spring temperature (negative interaction), elevation  
296 and latitude (both positive interactions) were significant predictors of DOY (Supplemental  
297 Figure S2). Regression models with spring temperature, latitude, and elevation explained more  
298 or similar variation (marginal  $R^2$ ) in DOY to more complex models, thus, we used these three  
299 variables in subsequent modeling of changes to the spring phenological window (see below).

300 Using a hierarchical Bayesian approach, we modeled DOY of the observed phenological  
301 event (leaf-out or flowering) for individual  $i$  of species  $j$  using a normal likelihood distribution  
302 (see Lee et al., 2022):

$$303 \quad \text{DOY}_{i,j} \sim N(\mu_{i,j}, \sigma^2) \quad (2)$$

304 The mean,  $\mu$ , was modeled with an intercept term ( $\beta_0$ ), slope terms representing phenological  
305 sensitivity to mean spring temperature ( $\beta_1$ ), elevation ( $\beta_2$ ), latitude ( $\beta_3$ ), and species random  
306 effects ( $\alpha_j$ ):

$$307 \quad \mu_{i,j} = \beta_0 + \beta_1 \times \text{SpringTemp} + \beta_2 \times \text{Elevation} + \beta_3 \times \text{Latitude} + \alpha_j \quad (3)$$

308 We used slightly informative priors to estimate parameters:  $\beta_0, \beta_1, \beta_2, \beta_3, \alpha_j \sim N(0, 1E-3)$ ;  $1/\sigma^2$   
309  $\sim \text{Uniform}(0,100)$ . Our models used 3,000 burn-in iterations, and three MCMC chains each  
310 containing 10,000 iterations. Models were run separately for each stratum for the full AT (i.e.,  
311 canopy vs. understory, addressing Q1 and Q2), and for each AT region (addressing Q3)  
312 combination using the R2jags package (v0.7-1; Su and Yajima, 2022) in R v4.1.0 (R Core Team,  
313 2023). Models for each individual species from both functional groups were also run. Parameter  
314 values (means, variances, and covariances) were estimated from posterior distributions and are  
315 considered significantly different if the 95% credible intervals (CIs) of their posterior  
316 distributions do not overlap. Bayesian  $R^2$  values were calculated to evaluate variance explained  
317 by spring mean temperature on DOY (Gelman et al., 2019). Our parameter values were used to  
318 model the direction and magnitude of change to spring phenological windows across the  
319 landscape for each AT region in ArcPro v3.1. 1-km rasters of 30-year normal spring mean  
320 temperature (DAYMET), elevation (DEM), and latitude were used as raster math inputs to  
321 visualize changing phenological windows, but only for areas classified as temperate broadleaf  
322 forest using the GAP/LANDFIRE National Terrestrial Ecosystems dataset (USGS, 2016).

323 For functional group modeling of DOY, we ultimately used 11 of the 14 tree species for  
324 spring window calculations. The excluded species were still examined at a species level (see  
325 Table 2). We felt this approach was appropriate because these species had relatively few  
326 observations ( $n < 500$ ; e.g., *Sorbus americana*). To test the assumption that understory species  
327 flowering time is correlated with leaf-out timing, we re-ran all Bayesian models with DOY<sub>leaf</sub> of  
328 the understory as a response instead of DOY<sub>flower</sub>. General patterns for broad functional groups  
329 were not substantially different from one another (Supplemental Table S1).

## 330 Results

### 331 Q1 – Phenological patterns of understory and canopy species

332 Overall, spring phenology of both canopy trees and understory forest species tended to be  
333 earlier when mean spring temperatures (April-June) were warmer across the entire AT Corridor.  
334 On average, canopy trees advanced 3.8 days/°C of warming, while understory species as a whole  
335 advanced 6.4 days/°C (Table 3). This was true whether looking at understory DOY<sub>flower</sub> or  
336 DOY<sub>leaf</sub>, indicating that comparing understory flowering and canopy leaf-out timing was  
337 appropriate as a proxy for understory leaf-out (Supplemental Table S1). Nine of the 11  
338 understory species and six of the 14 canopy tree species significantly (95% CI non-overlapping  
339 with zero) advanced their spring phenologies with warmer temperatures (Table 4). For  
340 understory species, the spring ephemerals *Dicentra cucullaria* and *Erythronium americanum*  
341 displayed the highest temperature sensitivity for flowering ( $> 6$  days/°C), while *Clintonia*  
342 *borealis*, *Viburnum lantanoides*, and *Trientalis borealis* were the least sensitive ( $< 3$  days/°C,  
343 Table 4). For canopy tree species with significant sensitivity values, *Fagus grandifolia*, *Acer*  
344 *saccharum*, and *Quercus rubra* showed the most temperature sensitivity for leaf-out ( $> 4$   
345 days/°C), while *Acer rubrum* and *Betula alleghaniensis* were the least sensitive ( $< 3$  days/°C,  
346 Table 4). In general, later flowering or leaf-out occurred for individuals at higher elevations or  
347 latitudes, consistent with previous studies and predictions under Hopkins' Bioclimatic law (Table  
348 4).

349

350

351 *Q2 – Differences between functional groups*

352 Spring-flowering forest understory species responded more strongly to warmer  
353 temperatures than did canopy trees when data were pooled across the entire length of the AT  
354 Corridor – by approximately 1.6 days for every 1 °C increase in spring mean temperature (Table  
355 3). In particular, the understory species *Dicentra cucullaria*, *Erythronium americanum*,  
356 *Sanguinaria canadensis*, and our two *Trillium* species were much more sensitive to potential  
357 temperature increases than most individual canopy tree species, with the exception of *Fagus*  
358 *grandifolia* (Table 4). Greater understory sensitivity to temperature than canopy trees suggests an  
359 expansion of the spring phenological window. Our models revealed that greater window  
360 expansion was likely to occur at higher elevations and latitudes (Table 3).

361 *Q3 – Latitudinal patterns of phenology*

362 For southern and mid-Atlantic regions (34–38°N and 38–42°N, respectively), there were  
363 no detectable differences between functional groups in responsiveness of spring phenology to  
364 temperature (overlapping 95% CI). At northern latitudes (42–46°N), understory species as a  
365 group advanced their spring phenologies more strongly than trees with respect to temperature, by  
366 around 2.6 days/°C (Table 3, Figure 4). Both functional groups advanced their phenologies  
367 nearly twice as much in the mid-Atlantic region (38–42°N) than either southern or northern AT  
368 regions (Figure 4). Taken together, the phenological window likely experienced expansion to a  
369 greater degree in northern latitudes, and in general, at higher elevations for all regions examined  
370 (Figure 5). Spring windows expanded little or remained stable at mid- to southern latitudes  
371 (Figure 5). We found that annual mean spring temperatures in our dataset increased for all  
372 regions over the timespan analyzed (2004–2022), but only significantly at higher latitudes  
373 (Figure 6), indicating greater warming at northern latitudes and more variation in temperature for  
374 which plants can respond.

375 **Discussion**

376 Overall, we find regional disparities of plant spring phenological response to warming for  
377 species within temperate deciduous forests of the eastern United States. Specifically, we  
378 illustrate that spring phenology is advancing with temperature for both spring blooming forest  
379 understory species and canopy trees in North America's eastern hardwood forest ecosystems

380 (addressing Q1). Spring phenology is also advancing to a greater degree at both higher latitudes  
381 and elevations for most species examined. However, understory species' phenologies are  
382 advancing at a greater rate than canopy tree leaf-out phenologies, but only significantly so at  
383 northern latitudes (42–46°N) with no detectable difference between functional groups for lower  
384 and middle latitudes (34–42°N, addressing Q2). Furthermore, both functional groups vary in  
385 their phenological response to warmer temperatures across the latitudinal range, with understory  
386 plants and canopy trees at middle latitudes advancing their spring phenologies more than those at  
387 lower and higher latitudes (addressing Q3). Given that both functional groups were more  
388 sensitive to temperature at middle latitudes (38–42°N) compared to low (34–38°N) and high  
389 latitudes (42–46°N), other unmeasured factors may be at play influencing the temporal dynamics  
390 of the spring phenological window. Since a high proportion of mid-Atlantic observations were  
391 taken in urban areas (many near the New York City metropolitan area), one unexplored  
392 possibility is that the temperature sensitivity of this region may be due to effects from land-use  
393 (Luo et al., 2007; Zipper et al., 2016).

394         The phenological advance of both deciduous tree and spring-flowering understory plants  
395 is supported by previous studies and suggests that rising spring temperatures could increase the  
396 length of the growing season in temperate deciduous forests (Monahan et al. 2016; Melaas et al.,  
397 2018; Seyednasrollah et al., 2020; Moon et al., 2021; Li et al., 2022). However, while our finding  
398 that understory spring phenology is advancing faster than deciduous canopy trees under warmer  
399 temperatures at northern latitudes (42–46°N) agrees with a recent study (Alecrim et al., 2022), it  
400 is at odds with other studies conducted within the same region (Heberling et al., 2019; Lee et al.,  
401 2022). The variation in canopy-understory phenology results across these studies may reflect  
402 differences in methodological approaches, including the density of observations, and the study  
403 species (see Alecrim et al., 2022; see below for possible explanations).

404         The observed differences in temperature sensitivity and potential changes to the spring  
405 phenological window could be attributed to either disparities in changing environmental  
406 conditions or differences in forest community composition across our latitudinal gradient.  
407 Calculated mean spring temperatures (April–June) reveal warming trends for all regions  
408 examined, however, only the northern AT experienced statistically significant warming between  
409 2004–2022 (Figure 6). While the Mid-Atlantic region displayed greater temperature sensitivities



410 for both understory plants and canopy trees than other regions, only in the northern AT did we  
411 find significantly different sensitivities between the two functional groups. It is possible that  
412 consequences of greater warming in the north are altering plant responses to a changing climate  
413 in ways at odds with conspecific southern populations (see below). Of course, disparate  
414 community composition which encapsulate our study species across regions may also be driving  
415 these patterns.

416         The northern AT region differs from lower latitudes in several other relevant ways. Most  
417 notably, the northern AT is characterized by longer and colder winters, deeper snowpack, shorter  
418 growing seasons, and is projected to warm faster than other regions over the course of this  
419 century (US National Climate Assessment, 2018 (<https://nca2018.globalchange.gov/>), Janowiak  
420 et al., 2018). These trends may be relevant in several ways. First, chilling requirements for  
421 understory plants may still be met in the north despite recent warming (at least up to a certain  
422 threshold not yet reached), meaning that these species will not suffer reduced performance and  
423 could, at least in the short term, benefit from a longer spring window before canopy closure  
424 (Zhang et al., 2007 Prevéy et al., 2017). Second, a decreasing snowpack, particularly in the  
425 north, would decrease soil temperatures in the late winter period (Zhu et al., 2019; Zohner et al.,  
426 2017), but would also allow for a greater time for herbaceous species to be uncovered by snow in  
427 the spring, a critical time for growth (Marchin et al., 2015; Augspurger and Salk, 2017; Contosta  
428 et al., 2017). While during the summer months understory temperatures are buffered (cooler) by  
429 the canopy, this is not the case prior to canopy closure in the spring – suggesting that understory  
430 species could be more directly influenced by surface air temperatures than has been previously  
431 suggested (Richardson and O’Keefe; De Frenne et al., 2011; Jacques et al., 2015; De Frenne et  
432 al., 2021). To resolve these various interacting factors, future work must measure relevant  
433 climate covariates, such as snow cover and soil temperature, in locations that record phenology  
434 of individual plants.

435         The temporal dynamics of spring phenology are hard to predict given the high variation  
436 in published sensitivities (e.g., Heberling et al., 2019; Alecrim et al., 2022; Lee et al., 2022). We  
437 argue that methodological differences between these disparate studies may be the root cause of  
438 the observed discrepancies. First, the phenophase used to model functional group temperature  
439 sensitivity (leaf-out vs. flowering) can influence the interpretation of the spring phenological



440 window. While we found that leaf-out and flowering timing were correlated in our study (and see  
441 Heberling et al., 2019), appropriate ancillary data is required to successfully utilize each metric.  
442 Namely, some kind of intensity value is needed to describe a distribution of these events, rather  
443 than a presence/absence record (Buonaiuto et al., 2021). Without this information, it is difficult  
444 to know the exact time of flowering or leaf-out. Second, a substantial amount of variation in both  
445 temporal and spatial ranges examined could lead to the observed differences in reported results.  
446 It would be difficult to compare the results of two phenological window studies examining  
447 advancing phenology with an order of magnitude difference in the time record illustrated  
448 (decadal vs. century timeframes), as the magnitude of warming is dissimilar (Ge et al., 2015;  
449 Alecrim et al., 2022). Likewise, results from studies examining specimens at a local scale may  
450 not be applicable to a regional-scale given the exponential growth of environmental variation  
451 encountered, especially in the context of microclimates and climate refugia (Wielgolaski, 1999;  
452 Wolkovich et al., 2021; Pastore et al., 2022). Third, the size and source of the dataset used may  
453 be critical for phenological studies. Large phenology datasets, as is the case with our study, are  
454 preferable to smaller ones for regional-scale studies; however, access to such rich data sources  
455 are not always possible.

456 This study is unique in this area given our large sample size and use of citizen-science  
457 derived iNaturalist data, which served to greatly expand the temporal and spatial variation  
458 described in our study region (Supplemental Figure S1). We recommend that similar future  
459 research engage with this efficacious resource. Further, while spring ephemerals and other  
460 herbaceous species have been the focus of understory phenology patterns, tree seedlings have  
461 largely been ignored in their phenological response to changing climate (Augspurger and  
462 Bartlett, 2003; Lopez et al., 2008; Richardson and O’Keefe, 2009; but see Lee and Ibanez,  
463 2021a). Seedlings represent the future composition of a forest, and any change in seedling  
464 survival and growth related to shifting phenology is important to capture (Lee and Ibanez, 2021a;  
465 2021b). We advocate for a stronger emphasis on observations of woody seedling species in the  
466 understory moving forward.

467 Earlier flowering and leaf-out relative to canopy closure could serve to benefit plant  
468 performance of understory forbs and shrubs through a number of mechanisms. Advanced leaf-  
469 out and flowering could trigger an increase in photosynthate accumulation and storage (Keenan

470 et al., 2014; Teets et al., 2023). Greater access to resources could also provide a boost to both  
471 vegetative growth and reproduction (Kudo et al., 2008; Heberling et al., 2019). Thus, assuming  
472 understory plant fitness is not affected by other changes caused by shifting phenology or other  
473 climate changes such as extreme precipitation or drought, an expansion of the phenological  
474 window could make these species more resilient to a changing climate. This is especially true for  
475 spring ephemeral species which almost entirely rely on high light availability in the spring.  
476 Indeed, our results reveal that the most temperature sensitive species were ephemeral species  
477 such as *Dicentra*, *Erythronium*, *Trillium*, and *Sanguinaria*.

478         Advancing understory spring leaf-out and flowering may also have negative impacts on  
479 plant performance. First, earlier leaf-out could expose both spring ephemerals and trees to  
480 unpredictable late frost (or “false spring”) events which can cause significant physical damage  
481 and loss of fitness, particularly as climate change makes extreme frost events more common  
482 (Augspurger, 2009; Marino et al., 2011, Casson et al. 2019). Leaf or leaf-bud loss to frost  
483 represents a significant cost for deciduous trees, affecting growth, reproduction, canopy  
484 expansion and nutrient reserves, as refoliation to compensate for damage demands extra  
485 resources (Inouye, 2008; Augspurger, 2009; Pardee et al., 2019). Second, plant phenological  
486 shifts relative to herbivores and pollinators may have a large effect on plant performance. For  
487 instance, shifts in timing of herbivore emergence relative to plant phenology, as well as changes  
488 in the frequency or severity of herbivore outbreaks could have major impacts on understory  
489 shading and carbon budgets of trees and understory plants (Kudo et al., 2008; Weed et al., 2013).  
490 Importantly, if plants and insects do not respond at the same rate to warming, mismatches  
491 between flowers and flower-visitors could occur (Kudo and Ida, 2013; Petanidou et al., 2014;  
492 Forrest, 2015; Kudo and Cooper, 2019). While not as relevant for wind-pollinated deciduous  
493 trees, forest understory forbs are generally insect-pollinated, and given the short flowering period  
494 of these species, phenological mismatches between these plants and their pollinators are possible  
495 (Kudo and Ida, 2013; Kudo and Cooper, 2019).

## 496 *Conclusions*

497         Here, we find evidence that understory plants in eastern North America are advancing  
498 their spring phenologies 1.6 days/°C faster than canopy trees near full leaf-out; in other words,

499 this functional group appears more sensitive to air temperature increases than trees. The  
500 expansion of the spring phenological window could be a net positive for understory plant  
501 performance under changing climate conditions; however, many other unexplored phenomena,  
502 such as biotic interactions and climate-induced hydrologic variability, make forecasting changes  
503 to forest communities challenging. We note distinct patterns of phenological sensitivity across a  
504 latitudinal gradient, indicating that forest plant response to warming in eastern forests will not be  
505 uniform across space. It is also difficult to determine how specific species will ultimately  
506 respond to warming, or how long-term phenological dynamics will be altered (i.e., do threshold  
507 responses to warming exist for these species?). We posit that more spatially diverse phenological  
508 data, particularly from citizen-science driven efforts, can help inform research related to forest  
509 resilience to climate change, and that future work would greatly benefit from a more  
510 standardized approach.

## 511 **Acknowledgements**

512 We thank the National Phenology Network, the US Forest Service, the US National Park  
513 Service, Appalachian Mountain Club staff, interns and volunteers and citizen scientists across the  
514 AT Corridor. Doug Weihrauch initially helped conceive AMC's Mountain Watch Project. We  
515 thank Dr. Caitlin McDonough MacKenzie for her feedback on earlier versions of this  
516 manuscript. We also thank Dr. Ben Lee for helpful comments on methods and code used to  
517 perform our analyses, as well as Miriam Ritchie for assistance with some figures. Funding was  
518 provided by the AMC's Ken Kimball Research Fellowship, the Waterman Fund, the Forest  
519 Ecosystem Monitoring Cooperative (FEMC), a National Geographic Explorer Grant, the Adelard  
520 A. and Valeda Lea Roy Foundation, and the Appalachian Trail Conservancy's (ATC) Wild East  
521 Action Fund. Some data were provided by the USA National Phenology Network and the many  
522 participants who contribute to its Nature's Notebook program. Some data were also accessed  
523 through the iNaturalist platform and its many volunteer observers.

## 524 **Author Contributions**

525 JT conceived the research questions with input from GM and SN. JT planned and designed the  
526 research and conducted all data analysis with input from GM and SN. JT wrote the manuscript,  
527 and all authors contributed substantial revisions and edits.

528 **Conflict of Interest Statement**

529 The authors have no conflicts of interest to declare.

530 **Literature Cited**

531 Aerts, R., Cornelissen, J. H. C., & Dorrepaal, E. (2006). Plant performance in a warmer world: general  
532 responses of plants from cold, northern biomes and the importance of winter and spring  
533 events. *Plants and climate change*, 65-78.

534 Alecrim, E. F., Sargent, R. D., & Forrest, J. R. (2023). Higher-latitude spring-flowering herbs advance  
535 their phenology more than trees with warming temperatures. *Journal of Ecology*, 111(1), 156-  
536 169.

537 Augspurger, C. K., & Bartlett, E. A. (2003). Differences in leaf phenology between juvenile and adult  
538 trees in a temperate deciduous forest. *Tree Physiology*, 23(8), 517-525.

539 Augspurger, C. K. (2009). Spring 2007 warmth and frost: phenology, damage and refoilation in a  
540 temperate deciduous forest. *Functional Ecology*, 23(6), 1031-1039.

541 Augspurger, C. K., & Salk, C. F. (2017). Constraints of cold and shade on the phenology of spring  
542 ephemeral herb species. *Journal of Ecology*, 105(1), 246-254.

543 Barve, V. V., Brenskelle, L., Li, D., Stucky, B. J., Barve, N. V., Hantak, M. M., & Guralnick, R. P.  
544 (2020). Methods for broad-scale plant phenology assessments using citizen scientists'  
545 photographs. *Applications in Plant Sciences*, 8(1), e11315.

546 Beard, K. H., Kelsey, K. C., Leffler, A. J., & Welker, J. M. (2019). The missing angle: ecosystem  
547 consequences of phenological mismatch. *Trends in Ecology & Evolution*, 34(10), 885-888.

548 Beeles, K. L., Tourville, J. C., & Dovciak, M. (2022). Characterizing canopy openness across large  
549 forested landscapes using spherical densiometer and smartphone hemispherical  
550 photography. *Journal of Forestry*, 120(1), 37-50.

551 Bonney, R., Phillips, T. B., Ballard, H. L., & Enck, J. W. (2016). Can citizen science enhance public  
552 understanding of science?. *Public understanding of science*, 25(1), 2-16.

553 Buonaiuto, D. M., & Wolkovich, E. M. (2021). Differences between flower and leaf phenological  
554 responses to environmental variation drive shifts in spring phenological sequences of temperate  
555 woody plants. *Journal of Ecology*, 109(8), 2922-2933.

556 Burns, D. A., McDonnell, T. C., Rice, K. C., Lawrence, G. B., & Sullivan, T. J. (2020). Chronic and  
557 episodic acidification of streams along the Appalachian Trail corridor, eastern United  
558 States. *Hydrological Processes*, 34(7), 1498-1513.

559 Callaghan, C. T., Mesaglio, T., Ascher, J. S., Brooks, T. M., Cabras, A. A., Chandler, M., & Young, A.  
560 N. (2022). The benefits of contributing to the citizen science platform iNaturalist as an  
561 identifier. *PLoS biology*, 20(11), e3001843.

562 Casson, N. J., Contosta, A. R., Burakowski, E. A., Campbell, J. L., Crandall, M. S., Creed, I. F., &  
563 Nelson, S. J. (2019). Winter weather whiplash: impacts of meteorological events misaligned with

- 564 natural and human systems in seasonally snow-covered regions. *Earth's Future*, 7(12), 1434-  
565 1450.
- 566 Cleland, E. E., Chuine, I., Menzel, A., Mooney, H. A., & Schwartz, M. D. (2007). Shifting plant  
567 phenology in response to global change. *Trends in ecology & evolution*, 22(7), 357-365.
- 568 Climate Change Science Program (US). (2014). *Climate change impacts in the United States, highlights:*  
569 *US national climate assessment*. US Global Change Research Program.
- 570 Cohn, J. P. (2008). Citizen science: Can volunteers do real research?. *BioScience*, 58(3), 192-197.
- 571 Contosta, A. R., Adolph, A., Burchsted, D., Burakowski, E., Green, M., Guerra, D., & Wollheim, W.  
572 (2017). A longer vernal window: the role of winter coldness and snowpack in driving spring  
573 transitions and lags. *Global Change Biology*, 23(4), 1610-1625.
- 574 Cooper, C. B., Hawn, C. L., Larson, L. R., Parrish, J. K., Bowser, G., Cavalier, D., & Wilson, S. (2021).  
575 Inclusion in citizen science: The conundrum of rebranding. *Science*, 372(6549), 1386-1388.
- 576 Daymet: Daily Surface Weather Data on a 1-km Grid for North America, Version 4  
577 R1 <https://doi.org/10.3334/ORNLDAAC/2129>
- 578 De Frenne, P., Brunet, J., Shevtsova, A., Kolb, A., Graae, B. J., Chabrierie, O., & Verheyen, K. (2011).  
579 Temperature effects on forest herbs assessed by warming and transplant experiments along a  
580 latitudinal gradient. *Global Change Biology*, 17(10), 3240-3253.
- 581 De Frenne, P., Lenoir, J., Luoto, M., Scheffers, B. R., Zellweger, F., Aalto, J., & Hylander, K. (2021).  
582 Forest microclimates and climate change: Importance, drivers and future research agenda. *Global*  
583 *Change Biology*, 27(11), 2279-2297.
- 584 Du, Y., Mao, L., Queenborough, S. A., Primack, R., Comita, L. S., Hampe, A., & Ma, K. (2020). Macro-  
585 scale variation and environmental predictors of flowering and fruiting phenology in the Chinese  
586 angiosperm flora. *Journal of Biogeography*, 47(11), 2303-2314.
- 587 Ettinger, A. K., Gee, S., & Wolkovich, E. M. (2018). Phenological sequences: how early-season events  
588 define those that follow. *American Journal of Botany*, 105(10), 1771-1780.
- 589 Forrest, J. R. (2015). Plant–pollinator interactions and phenological change: what can we learn about  
590 climate impacts from experiments and observations?. *Oikos*, 124(1), 4-13.
- 591 Heberling, J. M., McDonough MacKenzie, C., Fridley, J. D., Kalisz, S., & Primack, R. B. (2019).  
592 Phenological mismatch with trees reduces wildflower carbon budgets. *Ecology Letters*, 22(4),  
593 616-623.
- 594 Hopkins, A. D. (1920). The bioclimatic law. *Journal of the Washington Academy of Sciences*, 10(2), 34-  
595 40.
- 596 Gavin, D. G., Beckage, B., & Osborne, B. (2008). Forest dynamics and the growth decline of red spruce  
597 and sugar maple on Bolton Mountain, Vermont: a comparison of modeling methods. *Canadian*  
598 *Journal of Forest Research*, 38(10), 2635-2649.
- 599 Ge, Q., Wang, H., & Dai, J. (2015). Phenological response to climate change in China: a meta-  
600 analysis. *Global change biology*, 21(1), 265-274.

- 601 Gelman, A., Goodrich, B., Gabry, J., & Vehtari, A. (2019). R-squared for Bayesian regression models.  
602 *The American Statistician*, 73(3), 307–309. <https://doi.org/10.1080/00031305.2018.1549100>
- 603 Gilliam, F. S. (2007). The ecological significance of the herbaceous layer in temperate forest  
604 ecosystems. *BioScience*, 57(10), 845-858.
- 605 Inouye, D. W. (2008). Effects of climate change on phenology, frost damage, and floral abundance of  
606 montane wildflowers. *Ecology*, 89(2), 353-362.
- 607 Jacques, M. H., Lapointe, L., Rice, K., Montgomery, R. A., Stefanski, A., & Reich, P. B. (2015).  
608 Responses of two understory herbs, *Maianthemum canadense* and *Eurybia macrophylla*, to  
609 experimental forest warming: Early emergence is the key to enhanced reproductive  
610 output. *American journal of botany*, 102(10), 1610-1624.
- 611 Jánosi, I. M., Silhavy, D., Tamás, J., & Csontos, P. (2020). Bulbous perennials precisely detect the length  
612 of winter and adjust flowering dates. *New Phytologist*, 228(5), 1535-1547.
- 613 Janowiak, M. K., D'Amato, A., Swanston, C. W., Iverson, L. R., Thompson, F. R., Dijak, W. D., &  
614 Templar, P. H. (2018). *New England and northern New York forest ecosystem vulnerability*  
615 *assessment and synthesis: a report from the New England Climate Change Response Framework*  
616 *project* (No. NRS-173). Northern Research Station.
- 617 Keenan, T. F., Gray, J., Friedl, M. A., Toomey, M., Bohrer, G., Hollinger, D. Y., & Richardson, A. D.  
618 (2014). Net carbon uptake has increased through warming-induced changes in temperate forest  
619 phenology. *Nature Climate Change*, 4(7), 598-604.
- 620 Kimball, K. D., Davis, M. L., Weihrauch, D. M., Murray, G. L., & Rancourt, K. (2014). Limited alpine  
621 climatic warming and modeled phenology advancement for three alpine species in the Northeast  
622 United States. *American journal of botany*, 101(9), 1437-1446.
- 623 Kudo, G., Ida, T. Y., & Tani, T. (2008). Linkages between phenology, pollination, photosynthesis, and  
624 reproduction in deciduous forest understory plants. *Ecology*, 89(2), 321-331.
- 625 Kudo, G., & Ida, T. Y. (2013). Early onset of spring increases the phenological mismatch between plants  
626 and pollinators. *Ecology*, 94(10), 2311-2320.
- 627 Kudo, G., & Cooper, E. J. (2019). When spring ephemerals fail to meet pollinators: mechanism of  
628 phenological mismatch and its impact on plant reproduction. *Proceedings of the Royal Society*  
629 *B*, 286(1904), 20190573.
- 630 Lee, B. R., & Ibáñez, I. (2021a). Spring phenological escape is critical for the survival of temperate tree  
631 seedlings. *Functional Ecology*, 35(8), 1848-1861.
- 632 Lee, B. R., & Ibáñez, I. (2021b). Improved phenological escape can help temperate tree seedlings  
633 maintain demographic performance under climate change conditions. *Global Change*  
634 *Biology*, 27(16), 3883-3897.
- 635 Lee, B. R., Miller, T. K., Rosche, C., Yang, Y., Heberling, J. M., Kuebbing, S. E., & Primack, R. B.  
636 (2022). Wildflower phenological escape differs by continent and spring temperature. *Nature*  
637 *Communications*, 13(1), 7157.



- 638 Li, Z., Fang, H., Tu, J., Li, X., & Sha, Z. (2022). Phenological Shifts of the Deciduous Forests and Their  
639 Responses to Climate Variations in North America. *Forests*, 13(7), 1137.
- 640 Lopez, O. R., Farris-Lopez, K., Montgomery, R. A., & Givnish, T. J. (2008). Leaf phenology in relation  
641 to canopy closure in southern Appalachian trees. *American Journal of Botany*, 95(11), 1395-  
642 1407.
- 643 Luo, Z., Sun, O. J., Ge, Q., Xu, W., & Zheng, J. (2007). Phenological responses of plants to climate  
644 change in an urban environment. *Ecological Research*, 22, 507-514.
- 645 MacKenzie, C. M., Murray, G., Primack, R., & Weihrauch, D. (2017). Lessons from citizen science:  
646 Assessing volunteer-collected plant phenology data with Mountain Watch. *Biological  
647 conservation*, 208, 121-126.
- 648 McDonough MacKenzie, C., Primack, R. B., & Miller-Rushing, A. J. (2018). Local environment, not  
649 local adaptation, drives leaf-out phenology in common gardens along an elevational gradient in  
650 Acadia National Park, Maine. *American Journal of Botany*, 105(6), 986-995.
- 651 McDonough MacKenzie, C., Primack, R. B., & Miller-Rushing, A. J. (2019). Trails-as-transects:  
652 phenology monitoring across heterogeneous microclimates in Acadia National Park,  
653 Maine. *Ecosphere*, 10(3), e02626.
- 654 MacKenzie, C. M., Gallinat, A. S., & Zipf, L. (2020). Low-cost observations and experiments return a  
655 high value in plant phenology research. *Applications in plant sciences*, 8(4), e11338.
- 656 Marchin, R. M., Salk, C. F., Hoffmann, W. A., & Dunn, R. R. (2015). Temperature alone does not  
657 explain phenological variation of diverse temperate plants under experimental warming. *Global  
658 change biology*, 21(8), 3138-3151.
- 659 Marino, G. P., Kaiser, D. P., Gu, L., & Ricciuto, D. M. (2011). Reconstruction of false spring occurrences  
660 over the southeastern United States, 1901–2007: an increasing risk of spring freeze  
661 damage?. *Environmental Research Letters*, 6(2), 024015.
- 662 McKinley, P. S., Belote, R. T., & Aplet, G. H. (2019). An assessment of ecological values and  
663 conservation gaps in protection beyond the corridor of the Appalachian Trail. *Conservation  
664 Science and Practice*, 1(6), e30.
- 665 Melaas, E. K., Sulla-Menashe, D., & Friedl, M. A. (2018). Multidecadal changes and interannual  
666 variation in springtime phenology of North American temperate and boreal deciduous  
667 forests. *Geophysical Research Letters*, 45(6), 2679-2687.
- 668 Miller, T. K., Heberling, J. M., Kuebbing, S. E., & Primack, R. B. (2023). Warmer temperatures are  
669 linked to widespread phenological mismatch among native and non-native forest plants. *Journal  
670 of Ecology*, 111(2), 356-371.
- 671 Monahan, W. B., Rosemartin, A., Gerst, K. L., Fisichelli, N. A., Ault, T., Schwartz, M. D., & Weltzin, J.  
672 F. (2016). Climate change is advancing spring onset across the US national park  
673 system. *Ecosphere*, 7(10), e01465.



- 674 Montgomery, R. A., Rice, K. E., Stefanski, A., Rich, R. L., & Reich, P. B. (2020). Phenological responses  
675 of temperate and boreal trees to warming depend on ambient spring temperatures, leaf habit, and  
676 geographic range. *Proceedings of the National Academy of Sciences*, *117*(19), 10397-10405.
- 677 Moon, M., Seyednasrollah, B., Richardson, A. D., & Friedl, M. A. (2021). Using time series of MODIS  
678 land surface phenology to model temperature and photoperiod controls on spring greenup in  
679 North American deciduous forests. *Remote Sensing of Environment*, *260*, 112466.
- 680 Murray, G. L., Colgan, A. M., Nelson, S. J., Kelsey, E. P., & Kimball, K. D. (2021). Climate trends on  
681 the highest peak of the Northeast: Mount Washington, NH. *Northeastern Naturalist*, *28*(sp11),  
682 64-82.
- 683 Neufeld, H. S., & Young, D. R. (2003). Ecophysiology of the herbaceous layer in temperate deciduous  
684 forests. *The herbaceous layer in forests of eastern North America*, 38-90.
- 685 Nugent, J. (2018). iNaturalist. *Science Scope*, *41*(7), 12-13.
- 686 Pardee, G. L., Jensen, I. O., Inouye, D. W., & Irwin, R. E. (2019). The individual and combined effects of  
687 snowmelt timing and frost exposure on the reproductive success of montane forbs. *Journal of*  
688 *Ecology*, *107*(4), 1970-1981.
- 689 Pastore, M. A., Classen, A. T., D'Amato, A. W., Foster, J. R., & Adair, E. C. (2022). Cold-air pools as  
690 microrefugia for ecosystem functions in the face of climate change. *Ecology*, *103*(8), e3717.
- 691 Piao, S., Liu, Q., Chen, A., Janssens, I. A., Fu, Y., Dai, J., ... & Zhu, X. (2019). Plant phenology and  
692 global climate change: Current progresses and challenges. *Global change biology*, *25*(6), 1922-  
693 1940.
- 694 Pepin, N. C., Arnone, E., Gobiet, A., Haslinger, K., Kotlarski, S., Notarnicola, C., & Adler, C. (2022).  
695 Climate changes and their elevational patterns in the mountains of the world. *Reviews of*  
696 *Geophysics*, *60*(1), e2020RG000730.
- 697 Petanidou, T., Kallimanis, A. S., Sgardelis, S. P., Mazaris, A. D., Pantis, J. D., & Waser, N. M. (2014).  
698 Variable flowering phenology and pollinator use in a community suggest future phenological  
699 mismatch. *Acta Oecologica*, *59*, 104-111.
- 700 Prev y, J., Vellend, M., R ger, N., Hollister, R. D., Bjorkman, A. D., Myers-Smith, I. H., & Rixen, C.  
701 (2017). Greater temperature sensitivity of plant phenology at colder sites: implications for  
702 convergence across northern latitudes. *Global change biology*, *23*(7), 2660-2671.
- 703 R Core Team (2023). R: A language and environment for statistical computing. R Foundation for  
704 Statistical Computing, Vienna, Austria. URL <https://www.R-project.org/>.
- 705 Rafferty, N. E., & Ives, A. R. (2011). Effects of experimental shifts in flowering phenology on plant-  
706 pollinator interactions. *Ecology letters*, *14*(1), 69-74.
- 707 Rice, K. E., Montgomery, R. A., Stefanski, A., Rich, R. L., & Reich, P. B. (2018). Experimental warming  
708 advances phenology of groundlayer plants at the boreal-temperate forest ecotone. *American*  
709 *journal of botany*, *105*(5), 851-861.

- 710 Richardson, A. D., & O’Keefe, J. (2009). Phenological differences between understory and overstory: a  
711 case study using the long-term Harvard Forest records. *Phenology of ecosystem processes:  
712 applications in global change research*, 87-117.
- 713 Seyednasrollah, B., Young, A. M., Li, X., Milliman, T., Ault, T., Frohling, S., & Richardson, A. D.  
714 (2020). Sensitivity of deciduous forest phenology to environmental drivers: implications for  
715 climate change impacts across North America. *Geophysical Research Letters*, 47(5),  
716 e2019GL086788.
- 717 Soroye, P., Edwards, B. P., Buxton, R. T., Ethier, J. P., Frempong-Manso, A., Keefe, H. E., & Bennett, J.  
718 R. (2022). The risks and rewards of community science for threatened species  
719 monitoring. *Conservation Science and Practice*, 4(9), e12788.
- 720 Su, Y. S., & Yajima, M. (2022). R2jags: A Package for Running jags from R. *R package version 0.7-1*,  
721 URL <http://CRAN.R-project.org/package=R2jags>.
- 722 Tebes, J. K. (2005). Community science, philosophy of science, and the practice of research. *American  
723 journal of community psychology*, 35(3-4), 213-230.
- 724 Teets, A., Bailey, A. S., Hufkens, K., Ollinger, S., Schädel, C., Seyednasrollah, B., & Richardson, A. D.  
725 (2023). Early spring onset increases carbon uptake more than late fall senescence: modeling  
726 future phenological change in a US northern deciduous forest. *Oecologia*, 201(1), 241-257.
- 727 Tourville, J. C., Wason, J. W., & Dovciak, M. (2022). Canopy gaps facilitate upslope shifts in montane  
728 conifers but not in temperate deciduous trees in the Northeastern United States. *Journal of  
729 Ecology*, 110(12), 2870-2882.
- 730 U.S. Geological Survey (USGS) Gap Analysis Project (GAP), 2016, GAP/LANDFIRE National  
731 Terrestrial Ecosystems 2011: U.S. Geological Survey data  
732 release, <https://doi.org/10.5066/F7ZS2TM0>.
- 733 USA National Phenology Network (2022). Plant and animal phenology data. USA-NPN.  
734 <https://doi.org/10.5066/F78S4N1>
- 735 Wandersman, A. (2003). Community science: Bridging the gap between science and practice with  
736 community-centered models. *American journal of community psychology*, 31(3-4), 227-242.
- 737 Wang, H., Wang, H., Ge, Q., & Dai, J. (2020). The interactive effects of chilling, photoperiod, and  
738 forcing temperature on flowering phenology of temperate woody plants. *Frontiers in plant  
739 science*, 11, 443.
- 740 Wang, Y. (2020a). Climate Change: Ecosystem Dynamics along the Appalachian Trail. In *Atmosphere  
741 and Climate* (pp. 325-332). CRC Press.
- 742 Wang, Y. (2020b). Decision Support: Monitoring, Reporting, and Forecasting Ecological Conditions of  
743 Appalachian Trail. In *Terrestrial Ecosystems and Biodiversity* (pp. 359-363). CRC Press.
- 744 Wason, J. W., & Dovciak, M. (2017). Tree demography suggests multiple directions and drivers for  
745 species range shifts in mountains of Northeastern United States. *Global Change Biology*, 23(8),  
746 3335-3347.

- 747 Weed, A. S., Ayres, M. P., & Hicke, J. A. (2013). Consequences of climate change for biotic disturbances  
748 in North American forests. *Ecological Monographs*, 83(4), 441-470.
- 749 Wielgolaski, F. E. (1999). Starting dates and basic temperatures in phenological observations of  
750 plants. *International Journal of Biometeorology*, 42, 158-168.
- 751 Wolkovich, E. M., Cook, B. I., Allen, J. M., Crimmins, T. M., Betancourt, J. L., Travers, S. E., ... &  
752 Cleland, E. E. (2012). Warming experiments underpredict plant phenological responses to climate  
753 change. *Nature*, 485(7399), 494-497.
- 754 Wolkovich, E. M., Auerbach, J., Chamberlain, C. J., Buonaiuto, D. M., Ettinger, A. K., Morales-Castilla,  
755 I., & Gelman, A. (2021). A simple explanation for declining temperature sensitivity with  
756 warming. *Global Change Biology*, 27(20), 4947-4949.
- 757 Zhang, X., Tarpley, D., & Sullivan, J. T. (2007). Diverse responses of vegetation phenology to a warming  
758 climate. *Geophysical Research Letters*, 34(19).
- 759 Zipper, S. C., Schatz, J., Singh, A., Kucharik, C. J., Townsend, P. A., & Loheide, S. P. (2016). Urban heat  
760 island impacts on plant phenology: intra-urban variability and response to land  
761 cover. *Environmental Research Letters*, 11(5), 054023.
- 762 Zhu, L., Ives, A. R., Zhang, C., Guo, Y., & Radeloff, V. C. (2019). Climate change causes functionally  
763 colder winters for snow cover-dependent organisms. *Nature Climate Change*, 9(11), 886-893.
- 764 Zohner, C. M., Benito, B. M., Svenning, J. C., & Renner, S. S. (2016). Day length unlikely to constrain  
765 climate-driven shifts in leaf-out times of northern woody plants. *Nature Climate Change*, 6(12),  
766 1120-1123.
- 767 Zohner, C. M., Benito, B. M., Fridley, J. D., Svenning, J.-C., & Renner, S. S. (2017). Spring predictability  
768 explains different leaf-out strategies in the woody floras of North America, Europe and East Asia.  
769 *Ecology Letters*, 20(4), 452–460. <https://doi.org/10.1111/ele.12746>

770

771

772

773

774

775

776

777

778

779 **Tables**780 **Table 1:** Definitions of important terms used throughout the study.

| Term                             | Definition                                                                                                                                                                  |
|----------------------------------|-----------------------------------------------------------------------------------------------------------------------------------------------------------------------------|
| Phenology                        | Timing of recurring plant life stages and their relationships with weather and climate                                                                                      |
| Spring ephemeral                 | Perennial woodland wildflowers which develop aboveground early each spring, bloom, produce seed, and senesce during a brief window of time                                  |
| Leaf-out                         | Leaf expansion following leaf budburst during spring months                                                                                                                 |
| Canopy closure                   | Full overlap of expanded tree canopy leaves which fully shades the forest understory                                                                                        |
| Spring phenological window       | Brief period of high light conditions below the forest canopy starting with understory leaf-out and ending with full canopy closure                                         |
| Phenological mismatch            | Interacting species change the timing of regularly repeated phases in their life cycles at different rates                                                                  |
| Hopkins' Bioclimatic Law         | Hypothesized phenological pattern where a 4-day shift in phenology is predicted for a change of every 1° latitude north, 5° longitude west, and 120 m increase in elevation |
| Appalachian Trail Corridor (AT)  | Lands immediately surrounding the Appalachian Trail that follow the Appalachian Mountain chain from Georgia to Maine (USA)                                                  |
| iNaturalist                      | An online platform that allows sharing of biodiversity observations and creates research-quality citizen science data                                                       |
| Appalachian Mountain Club (AMC)  | An environmental non-profit organization dedicated to conservation, education, and recreation of lands within the AT Corridor                                               |
| National Phenology Network (NPN) | An organization established in 2007 to collect, store, and share phenology data and information                                                                             |
| Mountain Watch Project (MW)      | An AMC project established in 2004 to monitor phenological change in high elevation environments within the AT Corridor                                                     |
| Phenophase                       | An observable stage in the annual life cycle of a plant that can be defined by a start and end point                                                                        |
| Day of Year (DOY)                | Julian date for which a particular phenophase is observed for an individual plant                                                                                           |
| Intensity values                 | Ordinal categories for a particular phenophase                                                                                                                              |
| Plant performance                | Integrated measure of plant fitness which incorporates survival, growth, and reproductive success                                                                           |
| Forest climate resilience        | A measure of a forest's adaptability to a range of climate stresses which reflects the functional integrity of the ecosystem                                                |

781

782

783

784

785

786

787

788

789

790

791 **Table 2:** Abbreviations, definitions, and the data source of independent variables (by category) used for exploratory analyses for  
 792 predicting DOY of tree leaf-out and understory flowering across the AT Corridor. Elevation, latitude and longitude were derived from  
 793 geolocation data of individual observations and regional 2 m digital elevation models (DEM). Climate values were extracted from  
 794 DAYMET 1-km gridded datasets. AGDD was derived from extracted DAYMET temperature data.

| Category                               | Variable                                 | Abbreviation | Units                                                   | Description                                                     | Source |
|----------------------------------------|------------------------------------------|--------------|---------------------------------------------------------|-----------------------------------------------------------------|--------|
| Geography                              | Elevation                                | Elev         | m                                                       | altitude above sea level                                        | AMC    |
|                                        | Latitude                                 | Lat          | °                                                       | degrees latitude                                                | AMC    |
|                                        | Longitude                                | Long         | °                                                       | degrees longitude                                               | AMC    |
| Climate                                | Spring maximum temperature (AMJ)         | Spring Tmax  | °C                                                      | maximum spring temperature for each observation year            | DAYMET |
|                                        | Spring minimum temperature (AMJ)         | Spring Tmin  | °C                                                      | minimum spring temperature for each observation year            | DAYMET |
|                                        | Spring mean temperature (AMJ)            | Spring Tmean | °C                                                      | mean spring temperature for each observation year               | DAYMET |
|                                        | Accumulated solar radiation              | SR           | W/m <sup>2</sup>                                        | sum of incoming solar radiation for each observation year       | DAYMET |
|                                        | Maximum snow water equivalent (DJF)      | SWE          | mm                                                      | maximum snow water equivalent for observation winter            | DAYMET |
|                                        | Accumulated growing degree days          | AGDD         |                                                         | sum of daily temperatures over plant growth threshold           | DAYMET |
|                                        | Spring mean vapor pressure deficit (AMJ) | VPD          | Kpa                                                     | mean vapor pressure deficit of spring for observation year      | DAYMET |
|                                        | Total precipitation                      | PPT          | mm                                                      | sum of accumulated precipitation for spring of observation year | DAYMET |
| Previous mean winter temperature (DJF) | Winter Tmean                             | °C           | mean winter temperature for previous observation winter | DAYMET                                                          |        |

795

796

797

798

799

800

801

802

803

804

805

806 **Table 3:** Posterior parameter (and 95% credible intervals, CI) estimates of  $DOY_{leaf}$  (canopy) and  $DOY_{flower}$  (understory) from  
807 hierarchical Bayesian modeling for 8 species of understory plants and 11 species of canopy trees across the full AT and partitioned  
808 between the three study regions, South (34-38°N), Mid-Atlantic (38-42°N), and North (42-46°N). DIC (deviance information  
809 criterion) and Bayesian  $R^2$  are included. Bolded parameter estimates include 95% CI not overlapping zero.

| Full AT         |                  |       |        |       |                              |               |               |              |              |             |
|-----------------|------------------|-------|--------|-------|------------------------------|---------------|---------------|--------------|--------------|-------------|
| Region          | Functional Group | n     | DIC    | $R^2$ | Spring Mean Temperature (°C) | 95% CI        | Elevation (m) | 95% CI       | Latitude (°) | 95% CI      |
| Full AT         | Understory       | 45293 | 200745 | 0.51  | <b>-6.12</b>                 | -6.43, -5.82  | <b>30.80</b>  | 28.83, 32.77 | <b>2.42</b>  | 2.12, 2.72  |
| Full AT         | Canopy           | 72957 | 657608 | 0.23  | <b>-3.41</b>                 | -3.77, -3.06  | <b>20.30</b>  | 18.39, 22.31 | <b>3.87</b>  | 3.58, 4.17  |
| Region-specific |                  |       |        |       |                              |               |               |              |              |             |
| South           | Understory       | 10819 | 61861  | 0.30  | <b>-5.66</b>                 | -7.65, -3.63  | <b>6.25</b>   | 4.29, 8.21   | -3.27        | -5.03, 0.52 |
| South           | Canopy           | 35242 | 313516 | 0.19  | <b>-5.86</b>                 | -6.49, -5.28  | <b>13.64</b>  | 11.63, 15.58 | <b>3.80</b>  | 3.09, 4.58  |
| Mid-Atlantic    | Understory       | 10834 | 64166  | 0.29  | <b>-11.45</b>                | -13.56, -9.35 | -0.47         | -2.42, 1.48  | 2.85         | -0.17, 5.83 |
| Mid-Atlantic    | Canopy           | 13283 | 129899 | 0.17  | <b>-9.43</b>                 | -11.38, -7.46 | 1.98          | -0.09, 3.91  | 0.07         | -2.16, 2.26 |
| North           | Understory       | 23640 | 179396 | 0.69  | <b>-6.35</b>                 | -6.65, -6.06  | <b>37.83</b>  | 35.87, 39.82 | <b>1.64</b>  | 0.95, 2.33  |
| North           | Canopy           | 24432 | 197718 | 0.41  | <b>-3.68</b>                 | -4.10, -3.25  | <b>22.15</b>  | 20.22, 24.15 | <b>3.07</b>  | 2.20, 3.93  |

810

811

812

813

814

815

816

817

818

819

820

821 **Table 4:** Posterior parameter (and 95% credible intervals, CI) estimates of DOY<sub>leaf</sub> (canopy) and DOY<sub>flower</sub> (understory) from  
822 hierarchical Bayesian modeling for individual canopy tree (gray shading) and understory plant species across the full AT Corridor.  
823 DIC (deviance information criterion) is included. Bolded parameter estimates include 95% CI not overlapping zero.

| Species                | Common Name           | Functional Group | n     | DIC    | Spring Mean Temperature (°C) | 95% CI       | Elevation (m) | 95% CI       | Latitude (°) | 95% CI        |
|------------------------|-----------------------|------------------|-------|--------|------------------------------|--------------|---------------|--------------|--------------|---------------|
| Aquilegia canadensis   | Red columbine         | Understory       | 539   | 6398   | <b>-4.76</b>                 | -5.92, -3.54 | 1.17          | -2.61, 4.99  | <b>3.99</b>  | 3.16, 4.77    |
| Clintonia borealis     | Blue-bead lily        | Understory       | 5816  | 28739  | <b>-3.10</b>                 | -4.06, -2.67 | <b>26.83</b>  | 24.90, 28.79 | <b>4.31</b>  | 3.58, 5.09    |
| Cornus canadensis      | Canada dogwood        | Understory       | 5261  | 25607  | <b>-3.94</b>                 | -4.87, -2.87 | <b>11.96</b>  | 10.03, 13.91 | <b>4.59</b>  | 2.26, 6.76    |
| Dicentra cucullaria    | Dutchman's breeches   | Understory       | 571   | 7654   | <b>-6.02</b>                 | -7.15, -4.98 | <b>5.56</b>   | 7.87, 3.33   | <b>2.89</b>  | 3.65, 2.09    |
| Erythronium americanum | Trout lily            | Understory       | 5891  | 12382  | <b>-6.43</b>                 | -6.89, -6.07 | <b>3.10</b>   | 1.13, 5.02   | <b>2.65</b>  | 1.80, 3.49    |
| Maianthemum canadense  | Canada mayflower      | Understory       | 6975  | 38522  | <b>-5.06</b>                 | -6.34, -4.84 | <b>12.67</b>  | 10.76, 14.62 | 0.19         | -0.63, 1.01   |
| Sanguinaria canadensis | Bloodroot             | Understory       | 2434  | 3066   | <b>-5.27</b>                 | -6.79, -4.75 | -0.35         | -2.31, 1.59  | <b>7.48</b>  | 3.11, 11.74   |
| Trientalis borealis    | Starflower            | Understory       | 535   | 2217   | -0.42                        | -3.20, 2.67  | <b>3.42</b>   | 1.45, 5.38   | <b>-5.47</b> | -8.78, -2.20  |
| Trillium erectum       | Red trillium          | Understory       | 6018  | 29870  | <b>-5.74</b>                 | -7.94, -6.39 | <b>4.92</b>   | 2.98, 6.85   | <b>1.17</b>  | 0.44, 1.89    |
| Trillium undulatum     | Painted trillium      | Understory       | 6152  | 22471  | <b>-4.36</b>                 | -5.84, -3.42 | <b>14.33</b>  | 12.38, 16.23 | <b>3.47</b>  | 2.81, 4.13    |
| Viburnum lantanoides   | Hobblebush            | Understory       | 5101  | 32503  | <b>-3.53</b>                 | -4.68, -2.82 | <b>17.27</b>  | 15.26, 19.28 | <b>7.63</b>  | 6.46, 8.85    |
| Acer pensylvanicum     | Striped maple         | Canopy           | 7901  | 63799  | <b>-3.72</b>                 | -4.95, -2.49 | <b>12.01</b>  | 10.00, 14.00 | <b>3.55</b>  | 2.50, 4.59    |
| Acer rubrum            | Red maple             | Canopy           | 26926 | 241645 | <b>-1.71</b>                 | -2.25, -0.96 | <b>10.50</b>  | 8.58, 12.54  | <b>4.86</b>  | 4.33, 5.42    |
| Acer saccharum         | Sugar maple           | Canopy           | 9422  | 84363  | <b>-4.02</b>                 | -5.03, -3.10 | <b>-2.34</b>  | -4.24, -0.31 | <b>2.62</b>  | 1.85, 3.47    |
| Betula alleghaniensis  | Yellow birch          | Canopy           | 6069  | 49747  | <b>-2.61</b>                 | -3.24, -1.47 | <b>14.53</b>  | 12.63, 16.53 | <b>4.66</b>  | 3.86, 5.48    |
| Betula lenta           | Sweet birch           | Canopy           | 3548  | 32373  | 0.56                         | -0.94, 2.35  | <b>12.67</b>  | 10.61, 14.58 | <b>7.71</b>  | 6.68, 8.76    |
| Betula papyifera*      | Paper birch           | Canopy           | 270   | 2347   | -0.03                        | -6.12, 6.08  | <b>2.11</b>   | 0.14, 4.02   | -4.79        | -11.69, 3.83  |
| Fagus grandifolia      | American beech        | Canopy           | 8528  | 68346  | <b>-5.78</b>                 | -6.36, -4.35 | <b>2.22</b>   | 0.33, 4.14   | 0.74         | -0.04, 1.52   |
| Fraxinus americana     | White ash             | Canopy           | 790   | 7506   | 0.45                         | -3.37, 4.36  | 1.86          | -0.09, 3.80  | <b>5.08</b>  | 0.13, 10.13   |
| Ostrya virginiana      | Ironwood              | Canopy           | 674   | 6324   | -0.54                        | -4.40, 2.48  | <b>7.60</b>   | 5.65, 9.62   | <b>9.42</b>  | 5.25, 13.46   |
| Prunus pensylvanica*   | Pin cherry            | Canopy           | 360   | 3208   | -1.95                        | -9.82, 6.50  | -1.69         | -3.62, 0.31  | -6.92        | -22.07, 8.25  |
| Prunus serotina        | Black cherry          | Canopy           | 2966  | 27533  | 0.80                         | -0.42, 2.13  | <b>6.41</b>   | 4.51, 8.37   | <b>8.39</b>  | 6.45, 10.32   |
| Quercus rubra          | Red oak               | Canopy           | 4035  | 36833  | <b>-4.71</b>                 | -6.34, -2.40 | -0.69         | -2.63, 1.26  | 0.15         | -1.14, 1.43   |
| Sorbus americana*      | American mountain-ash | Canopy           | 418   | 3604   | -2.31                        | -12.47, 8.96 | <b>-5.37</b>  | -7.30, -3.41 | -5.88        | -27.30, 17.22 |
| Tilia americana        | American basswood     | Canopy           | 1050  | 9845   | -0.90                        | -3.48, 1.32  | <b>2.00</b>   | 0.04, 3.95   | <b>5.39</b>  | 2.25, 8.58    |

824 \*Species was modeled independently and not used in broad functional group modeling.

825

826

827

828



829 **Figures**

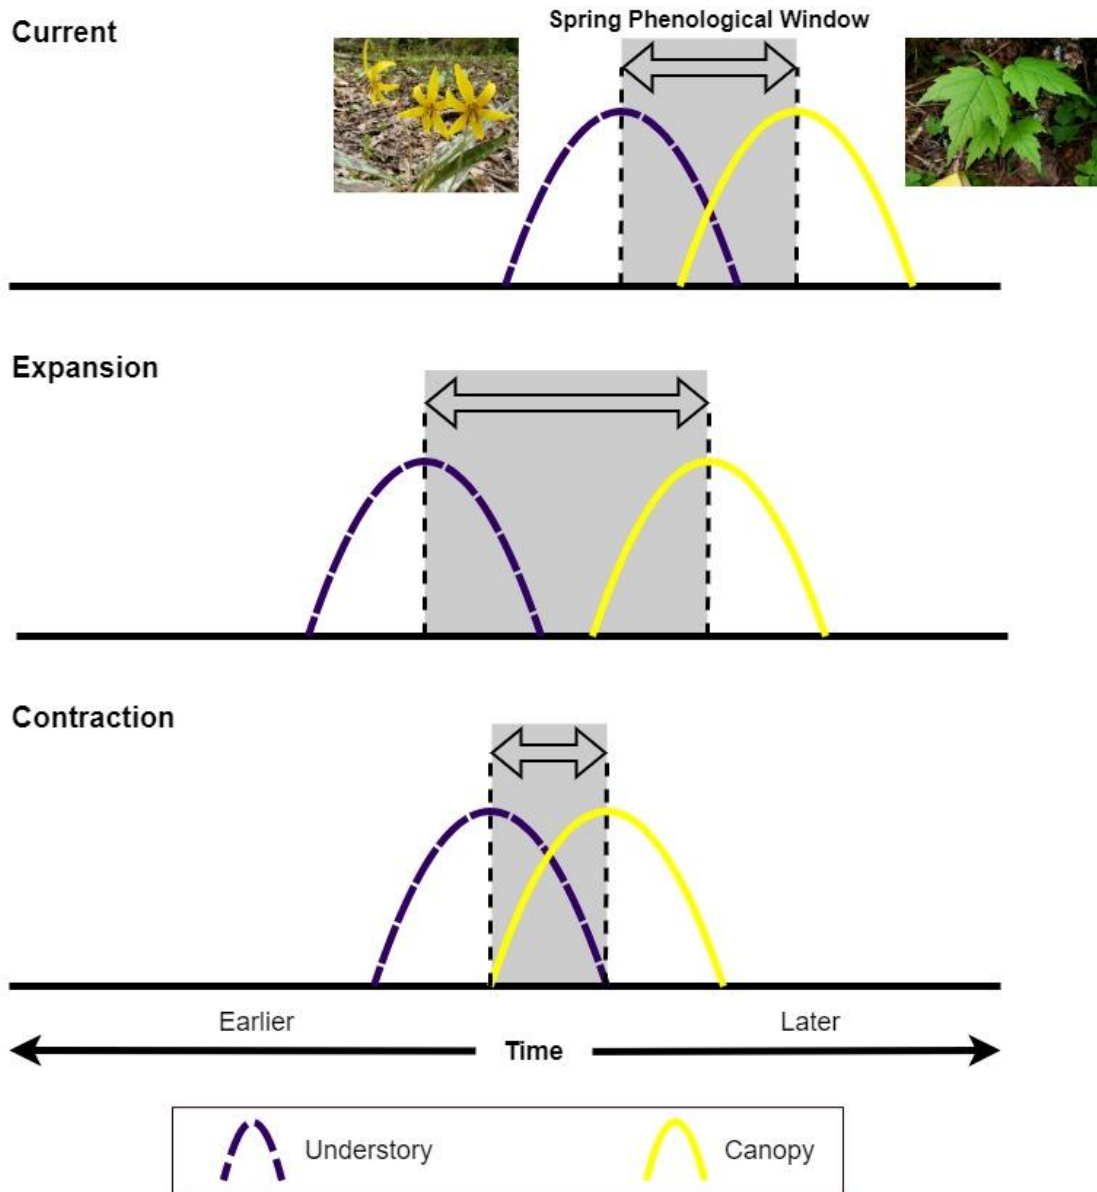

830

831 **Figure 1:** Conceptual diagram depicting different scenarios for the shifting spring phenological  
832 window under warming. Under the current scenario, both co-occurring understory (purple  
833 dashed curve) and canopy (yellow solid curve) species advance their phenologies at the same  
834 rate, keeping the window (shaded area) the same length through time. In an expansion scenario,  
835 understory plants advance their phenologies faster than canopy trees, leading to a greater period  
836 of high-light conditions for these species. Under the contraction scenario, canopy trees shift  
837 faster than understory plants with warming, reducing the period of high-light conditions for  
838 understory species and possibly leading to reduced annual carbon acquisition. Credit for all  
839 photos: Jordon Tourville.

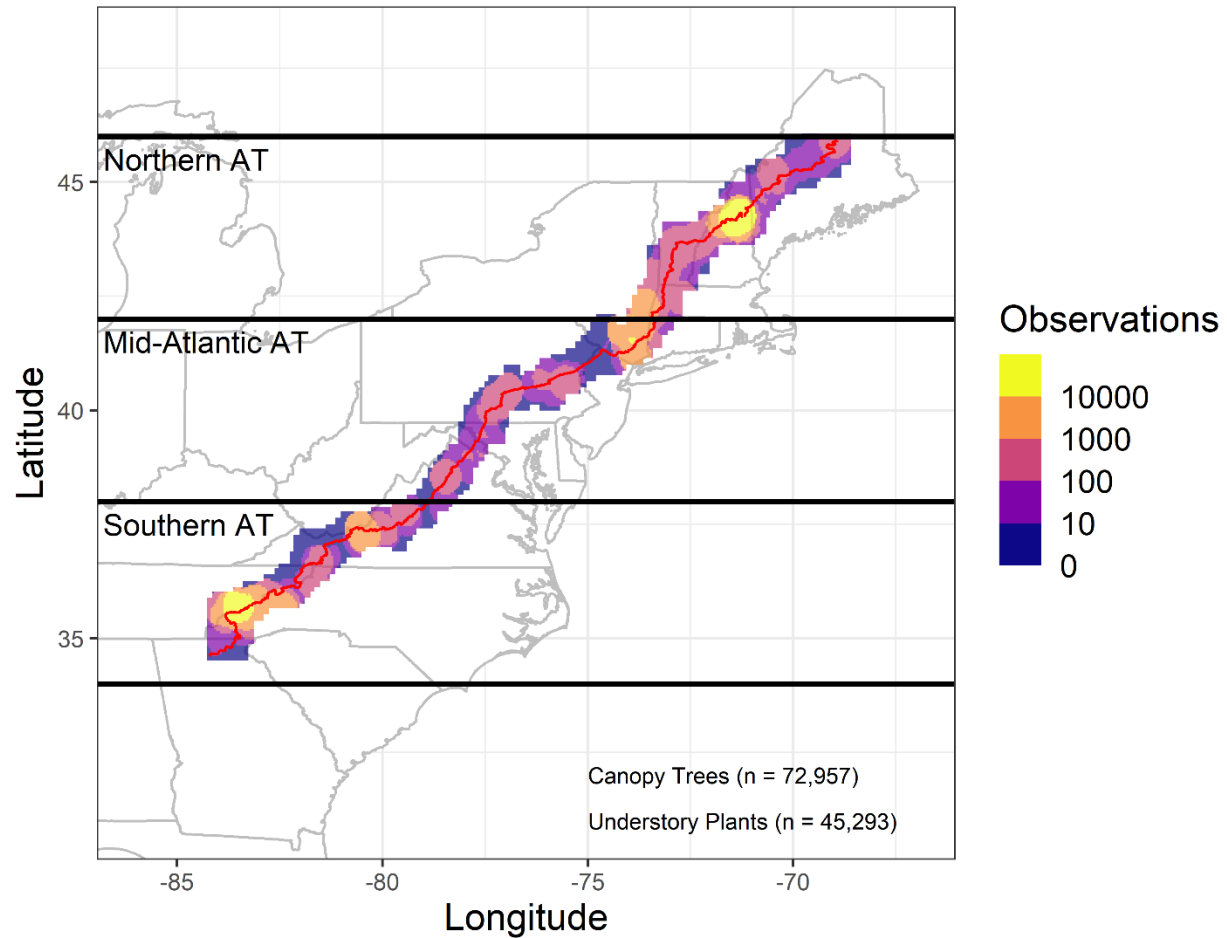

840

841 **Figure 2:** Point density estimates of canopy tree and understory plant spring phenology  
842 observations analyzed in this study across all HUC10 watersheds intersecting the AT between  
843 2004-2022 (n = 118,250). The red line indicates the Appalachian Trail. Note that the scale is  
844 logarithmic.

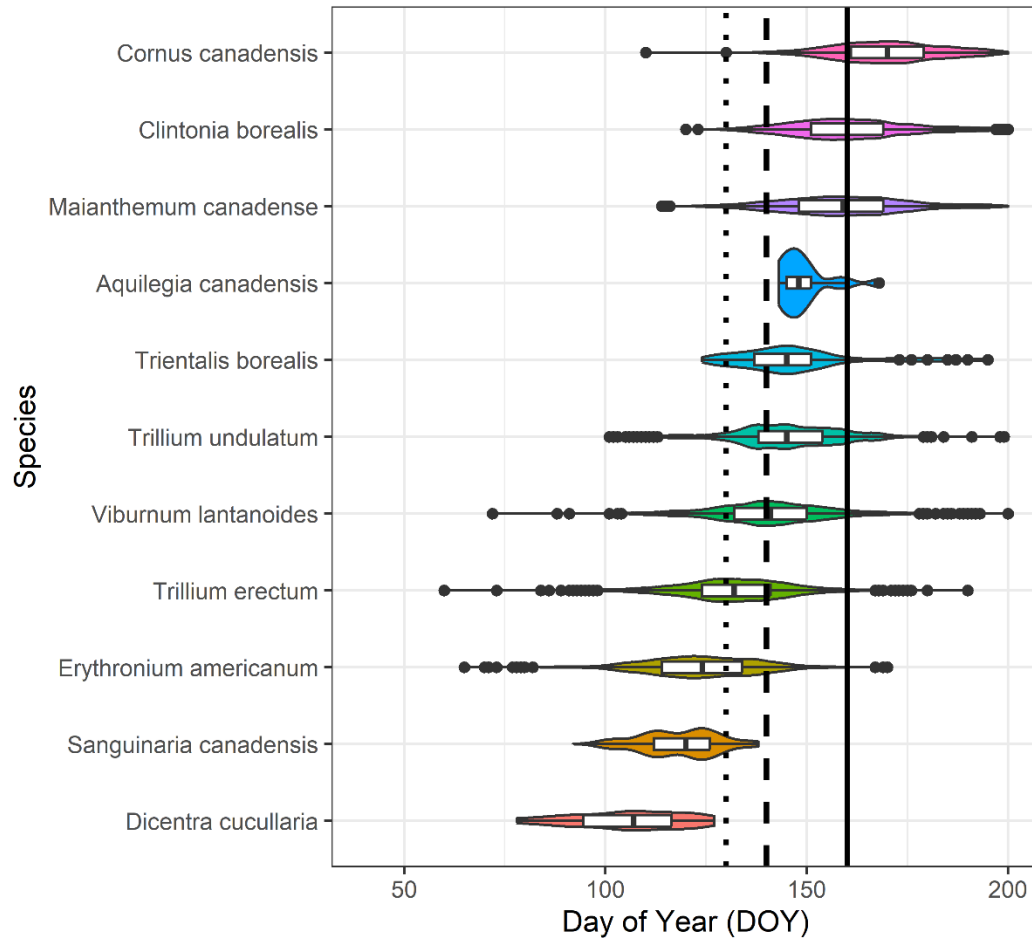

845

846 **Figure 3:** Density and distribution of understory flowering observations for each of the 11  
847 species examined in this study. The observations shown are only from the entire AT Corridor  
848 (34-46° N latitude). The solid line displays the median canopy closure date (from observed  
849 citizen-science data) between 2004-2022 for the northern AT (DOY = 160, June 9<sup>th</sup>), while the  
850 dashed and dotted lines show median canopy closure date for the mid-Atlantic (DOY = 140, May  
851 20<sup>th</sup>) and southern (DOY = 130, May 10<sup>th</sup>) AT regions, respectively. Asterisks (\*) indicate  
852 species definitively identified as spring ephemerals. Boxplots show median values for DOY<sub>flower</sub>  
853 (with 25% and 75% quantiles).

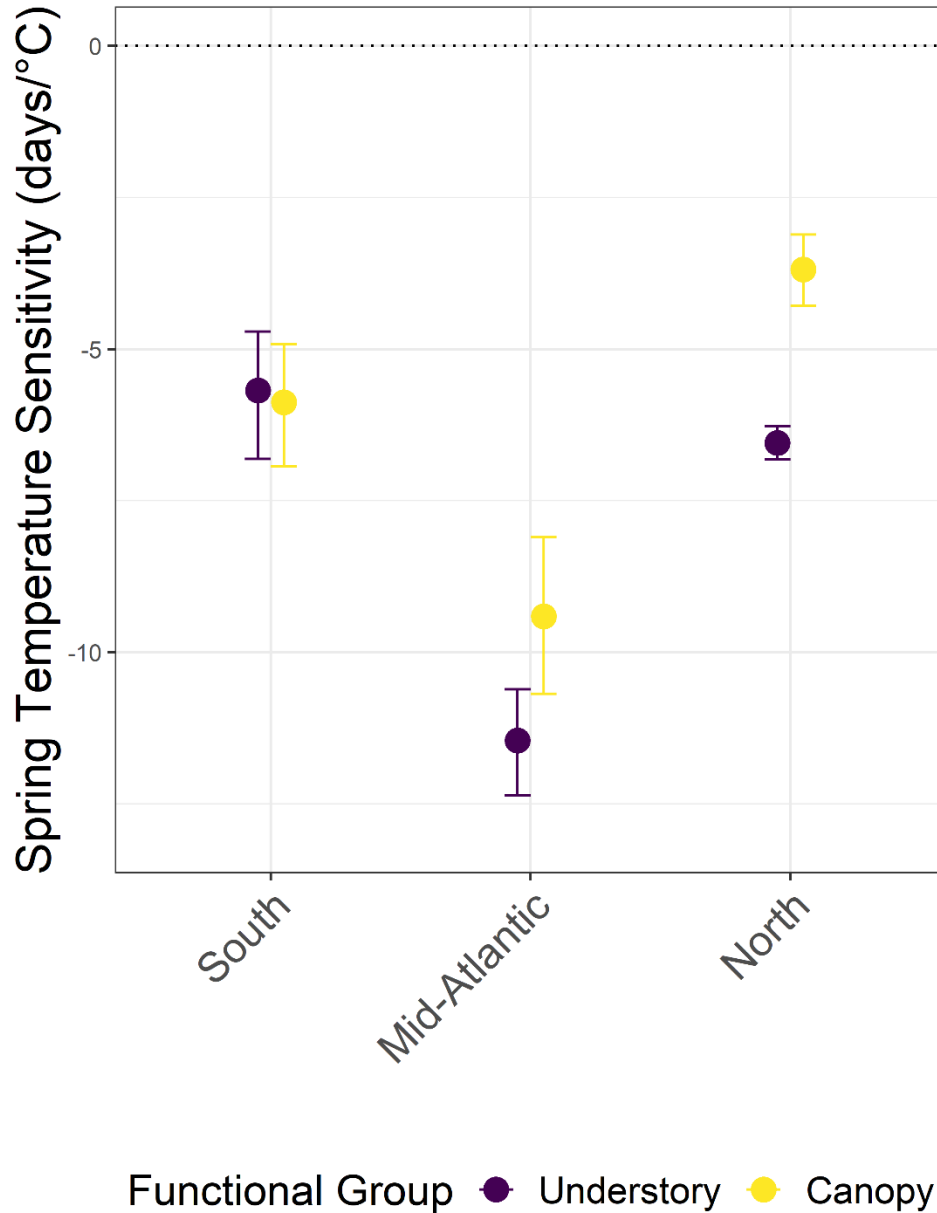

854

855 **Figure 4:** Spring temperature sensitivity (number of days of phenology advance per 1°C of  
856 warming) for both canopy trees and understory plants (as a whole), partitioned between our three  
857 study regions (with 95% CI). Negative y-axis values indicate earlier phenology with warming.  
858 The Northern region displays evidence for phenological window expansion, with a stable  
859 window illustrated for the Southern region. Understory species also display greater temperature  
860 sensitivity than canopy trees in the Mid-Atlantic region, although 95% CI overlap for both  
861 functional groups.

862

863

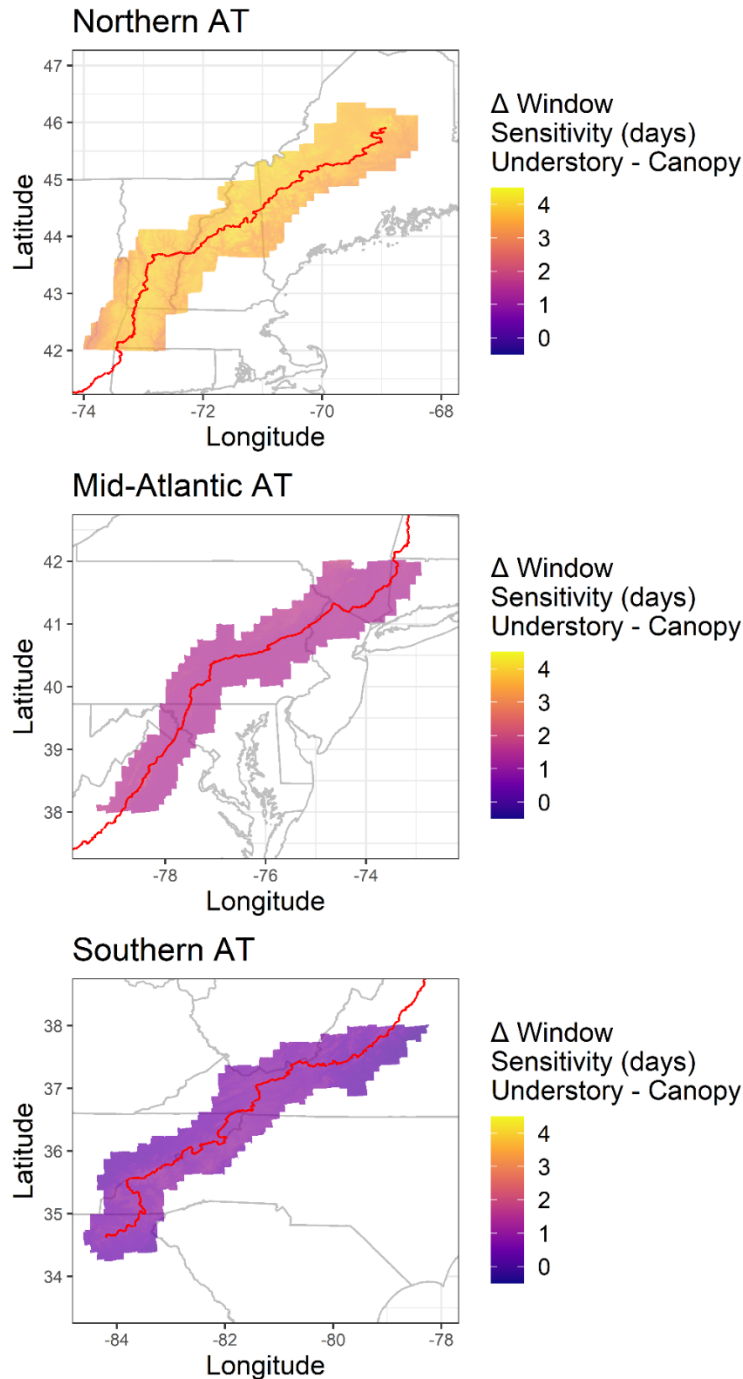

864

865 **Figure 5:** Changes ( $\Delta$ ) in spring phenological windows between understory plants and canopy  
866 trees, as influenced by temperature, elevation and latitude, in each study region along the AT  
867 Corridor. Warmer colors indicate greater possible phenological window expansions whereas  
868 cooler colors show smaller expansions, no differences, or contractions of the spring window.  
869 Greater window expansions occur more commonly at higher elevations and latitudes, particularly  
870 in the Northern region. Changes are more subtle in the Mid-Atlantic and Southern regions. The  
871 red line indicates the AT.

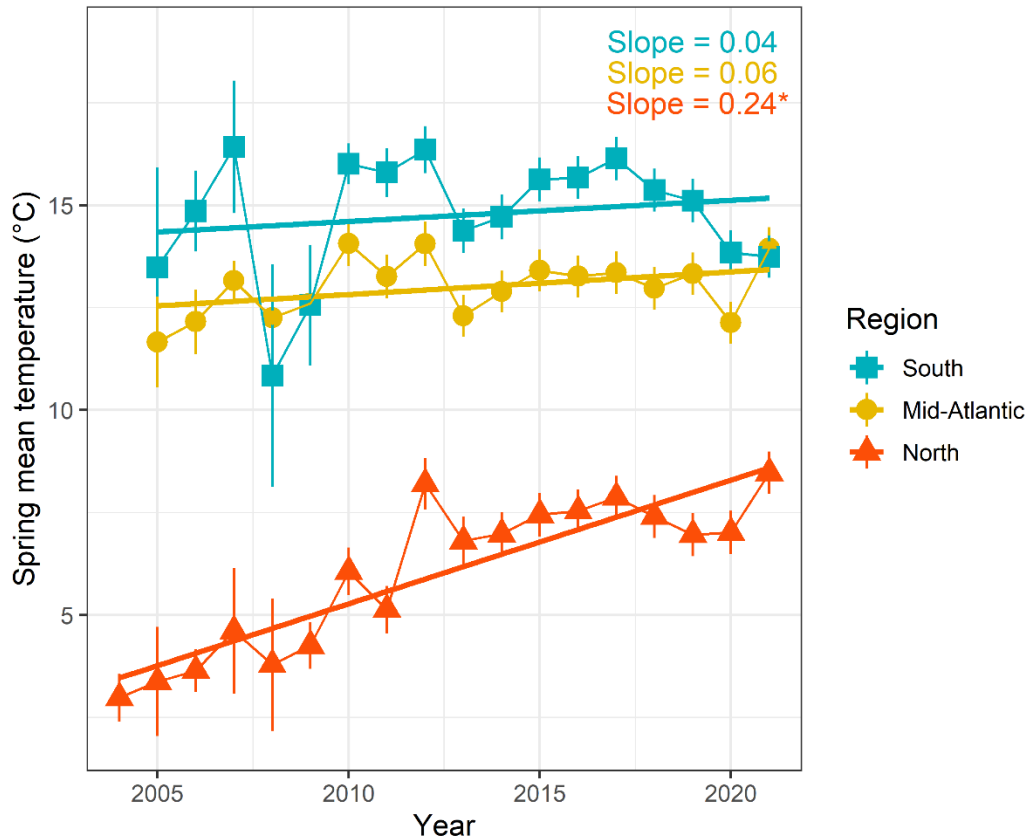

872

873 **Figure 6:** Annual spring (April-June) mean ( $\pm$ SE) temperatures between 2004-2022 across the  
874 AT Corridor, partitioned between three latitudinal bands (South: 34-38°N, blue squares; Mid-  
875 Atlantic: 38-42°N, orange circles; North: 42-46°N, red triangles). Linear fits display trends of  
876 increasing temperature through time, although only the Northern region experienced significant  
877 warming (see top-right for coefficient estimates and significance; \* $p < 0.05$ ). Temperatures were  
878 estimated from DAYMET daily measurements from all observation locations. Note that annual  
879 spring mean temperatures were not recorded for the South and Mid-Atlantic regions in 2004 due  
880 to poor data quality.
